# Supplementary material for: Are Currently Available Wearable Devices for Activity Tracking and Heart Rate Monitoring Accurate, Precise, and Medically Beneficial?
Source: PubMed Central journal article supplement — Healthc Inform Res. 2015 Oct 31;21(4):315–20. doi: 10.4258/hir.2015.21.4.315 (PMC4659890; doi:10.4258/hir.2015.21.4.315), 2015-10-31
Supplement: hir-21-315-s001.pdf [file hir-21-315-s001.pdf]

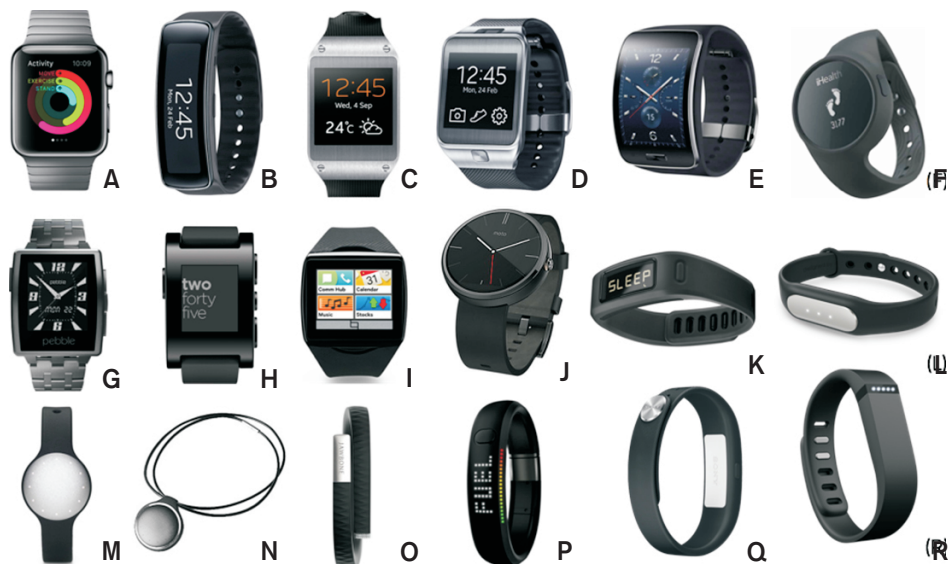

Figure 1. Trackers tested for accuracy, precision and validity. (A) Apple Watch, (B) Samsung Gear Fit, (C) Samsung Gear 1, (D) Samsung Gear 2, (E) Samsung Gear S, (F) iHealth Tracker (AM3), (G) Pebble Steel, (H) Pebble Watch, (I) Qualcomm Toq, (J) Motorola Moto 360, (K) Garmin Vivofit, (L) Mi Band, (M) MisFit Shine Band, (M) MisFit Shine necklace (O) Jawbone Up, (P) Nike+ Fuelband SE, (Q) Sony Smartband (SWR10), (R) FitBit Flex.
