# Supplementary material for: Are Currently Available Wearable Devices for Activity Tracking and Heart Rate Monitoring Accurate, Precise, and Medically Beneficial?
Source: PubMed Central journal article supplement — Healthc Inform Res. 2015 Oct 31;21(4):315–20. doi: 10.4258/hir.2015.21.4.315 (PMC4659890; doi:10.4258/hir.2015.21.4.315), 2015-10-31
Supplement: hir-21-315-s002.pdf [file hir-21-315-s002.pdf]

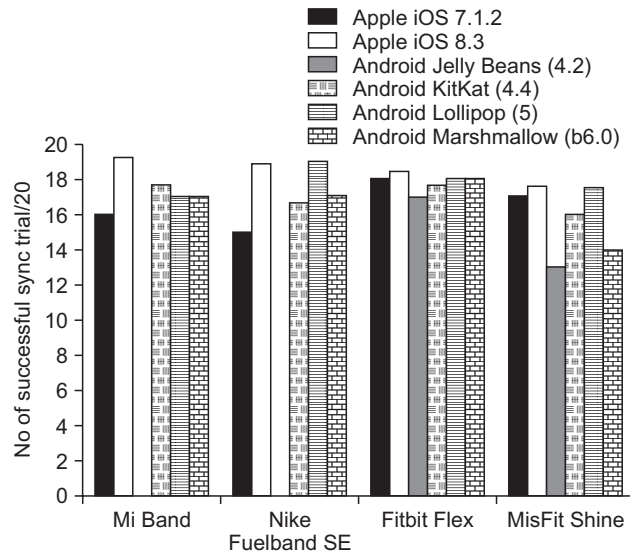

Figure 2. Bluetooth synchronization consistency of Xiaomi Mi Band, Nike Fuelband SE, Fitbit Flex, and MisFit Shine across various devices with Google Android and Apple iOS mobile operating systems represented as number of successful synchronization trials per 20 times on each device.
